# Supplementary material for: The Ecophysiological Performance and Traits of Genera within the Stichococcus-like Clade (Trebouxiophyceae) under Matric and Osmotic Stress
Source: MDPI journal article supplement (doi:10.3390/microorganisms9091816), 2021-08-26
Supplement: s1 [file s1]

| Strain ID   | Taxon identity                              | Initial avg. | Final avg.  | % Initial, 24 hrs |
|-------------|---------------------------------------------|--------------|-------------|-------------------|
| ASIB-IB-37  | <i>Deuterostichococcus tetrallantoideus</i> | 0.54 ± 0.03  | 0.20 ± 0.34 | 36.64             |
| J1303       | <i>Deuterstichococcus deasonii</i>          | 0.49 ± 0.04  | 0.27 ± 0.28 | 54.79             |
| SAG 11.88   | <i>Diplosphaera epiphytica</i>              | 0.51 ± 0.00  | 0.24 ± 0.25 | 47.28             |
| SAG 2481    | <i>Protostichococcus edaphicus</i>          | 0.38 ± 0.05  | 0.16 ± 0.20 | 42.57             |
| SAG 380-1   | <i>Pseudostichococcus monallantoides</i>    | 0.52 ± 0.02  | 0.28 ± 0.23 | 53.03             |
| CALU 1142   | <i>Pseudostichococcus undulatus</i>         | 0.57 ± 0.02  | 0.17 ± 0.13 | 29.92             |
| LB 1820     | <i>Pseudostichococcus sequoieti</i>         | 0.55 ± 0.02  | 0.24 ± 0.27 | 43.07             |
| CCAP 379/1A | <i>Stichococcus bacillaris</i>              | 0.46 ± 0.04  | 0.25 ± 0.20 | 53.38             |
| SAG 56.91   | <i>Stichococcus bacillaris</i>              | 0.49 ± 0.01  | 0.39 ± 0.25 | 78.31             |
| J1302       | <i>Tetratostichococcus jenerensis</i>       | 0.40 ± 0.02  | 0.18 ± 0.12 | 46.43             |
| SAG 2406    | <i>Tritostichococcus solitus</i>            | 0.55 ± 0.02  | 0.20 ± 0.30 | 35.90             |

**Tab. S2.** The average recovery of Y(II) values at 24 hours per strain, expressed as a percentage of initial Y(II). Averages over three experimental replicates per strain were taken. Higher recovery percentages indicate less damage to the photosynthetic apparatus.
