# Supplementary material for: The Ecophysiological Performance and Traits of Genera within the Stichococcus-like Clade (Trebouxiophyceae) under Matric and Osmotic Stress
Source: MDPI journal article supplement (doi:10.3390/microorganisms9091816), 2021-08-26
Supplement: s1 [file s1]

| Organism                                    | Strain      | 0 S <sub>A</sub> |         |       | 30 S <sub>A</sub> |         |       |
|---------------------------------------------|-------------|------------------|---------|-------|-------------------|---------|-------|
|                                             |             | Sorbitol         | Sucrose | Total | Sorbitol          | Sucrose | Total |
| <i>Desmococcus olivaceus</i>                | SAG 1.92    | 322              | 28      | 349   | 48                | -       | 48*   |
| <i>Deuterostichococcus marinus</i>          | J1303       | 116              | 106     | 222   | 93                | 135     | 228   |
| <i>Deuterostichococcus tetrallantoideus</i> | ASIB-IB-37  | 28               | 44      | 72    | 89                | 45      | 134   |
| <i>Diplosphaera epiphytica</i>              | SAG 11.88   | 376              | 69      | 445   | 200               | 57      | 257*  |
| <i>Protostichococcus edaphicus</i>          | SAG 2481    | 230              | 74      | 303   | 331               | 34      | 365   |
| <i>Pseudostichococcus monallantoides</i>    | SAG 380-1   | 89               | 9       | 97    | 240               | 18      | 258   |
| <i>Stichococcus sequoieti</i>               | LB 1820     | 242              | 111     | 353   | 120               | 74      | 362   |
| <i>Stichococcus undulatus</i>               | CALU-1142   | 295              | 126     | 421   | 311               | 57      | 285*  |
| <i>Stichococcus bacillaris</i>              | CCAP 379/1A | 151              | 121     | 273   | 288               | 33      | 153*  |
| <i>Stichococcus bacillaris</i>              | SAG 56.91   | 200              | 127     | 327   | 228               | 56      | 367   |
| <i>Tetrastichococcus jenerensis</i>         | J1302       | 74               | 17      | 91    | 129               | 34      | 163   |
| <i>Tritostichococcus solitus</i>            | SAG 2406    | 81               | 18      | 99    | 215               | 12      | 227   |

**Tab. S1.** Absolute concentrations of sorbitol and sucrose measured in cellular extracts of the strains after growth in 0 S<sub>A</sub> and 30 S<sub>A</sub> via HPLC

analysis. Totals<sub>30 S<sub>A</sub></sub> marked with a “\*” indicate a net decrease in osmolyte concentration compared to Totals<sub>0 S<sub>A</sub></sub>. Values are expressed in  $\mu\text{mol} \cdot \text{g}^{-1}$

<sup>1</sup> algal dry weight.
