# Supplementary material for: The Ecophysiological Performance and Traits of Genera within the Stichococcus-like Clade (Trebouxiophyceae) under Matric and Osmotic Stress
Source: MDPI journal article supplement (doi:10.3390/microorganisms9091816), 2021-08-26
Supplement: s1 [file s1]

| Strain                                                 | mg · L <sup>-1</sup> |
|--------------------------------------------------------|----------------------|
| J1303 <i>Deuterstichococcus marinus</i>                | 22.27 ± 12.00        |
| ASIB-IB-37 <i>Deuterostichococcus tetrallantoideus</i> | 26.69 ± 17.74        |
| SAG 11.88 <i>Diplosphaera epiphytica</i>               | 28.22 ± 3.640        |
| SAG 2481 <i>Protostichococcus edaphicus</i>            | 8.793 ± 3.246        |
| SAG 380-1 <i>Pseudostichococcus monallantoides</i>     | 5.526 ± 1.638        |
| LB 1820 <i>Pseudostichococcus sequoieti</i>            | 14.28 ± 9.455        |
| CALU-1142 <i>Pseudostichococcus undulatus</i>          | 25.63 ± 8.925        |
| CCAP 379/1 <i>Stichococcus bacillaris</i>              | 25.16 ± 13.21        |
| SAG 56.91 <i>Stichococcus bacillaris</i>               | 37.51 ± 8.627        |
| J1302 <i>Tetratostichococcus jenerensis</i>            | 17.65 ± 10.96        |
| SAG 2406 <i>Tritostichococcus solitus</i>              | 5.480 ± 4.585        |

**Tab. S3.** The average Chl*a* concentrations of 200 µL biomass dropped onto the filters of the dehydration experiment, expressed as mg Chl*a* · L<sup>-1</sup> (*n* = 3 per strain).
